# Supplementary material
Source: Springer Nature journal article supplement (https://www.springermedizin.de/resource/supplementary/12874_2008_320_MOESM3_ESM.pdf/9434310)

Observed diagnostic accuracy

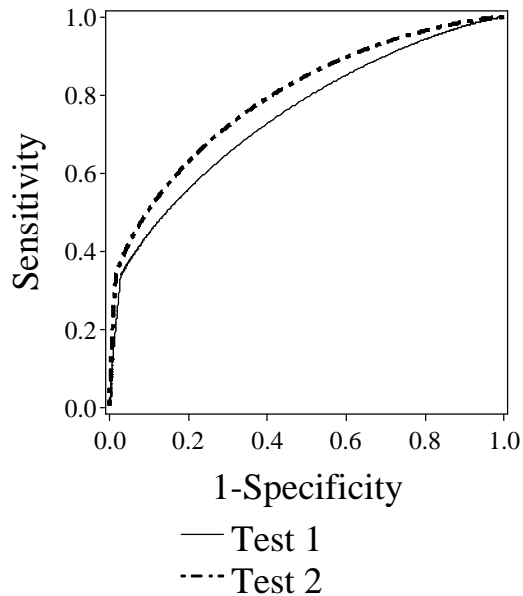

True diagnostic accuracy

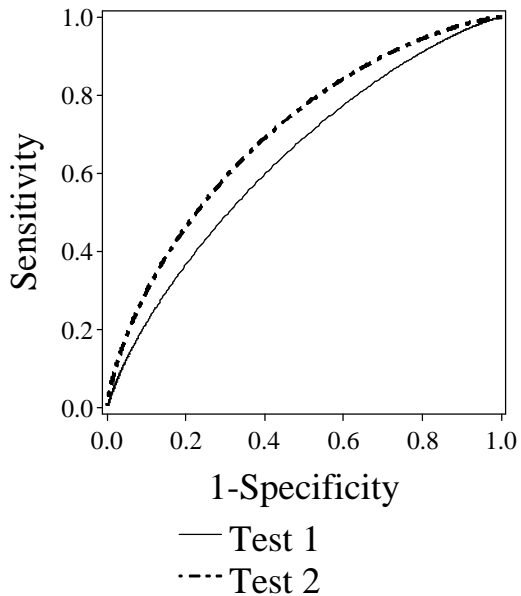

Supplement: MOESM3 [file 9434310]
